# Supplementary material for: Surface charge switchable and core cross-linked polyurethane micelles as a reduction-triggered drug delivery system for cancer therapy
Source: Royal Society of Chemistry journal article supplement (doi:10.1039/c7ra00346c), 2017-01-01
Supplement: c7ra00346c1.pdf [file c7ra00346c1.pdf]

## Supporting Information

### Surface Charge Switchable and Core Cross-linked Polyurethane Micelles as a Reduction-Triggered Drug Delivery System for Cancer Therapy

Chang Liu, Yayuan Guan, Yuling Su, Lili Zhao, Fancui Meng, Yongchao Yao and Jianbin Luo\*

College of Chemistry and Environmental Protection Engineering, Southwest University for

Nationalities, 610041 Sichuan, China

Tel: +86 28 6902063. Fax: +86 28 85522322

*E-mail addresses:* [luojb1971@163.com](mailto:luojb1971@163.com)

*Supplemental Figures*

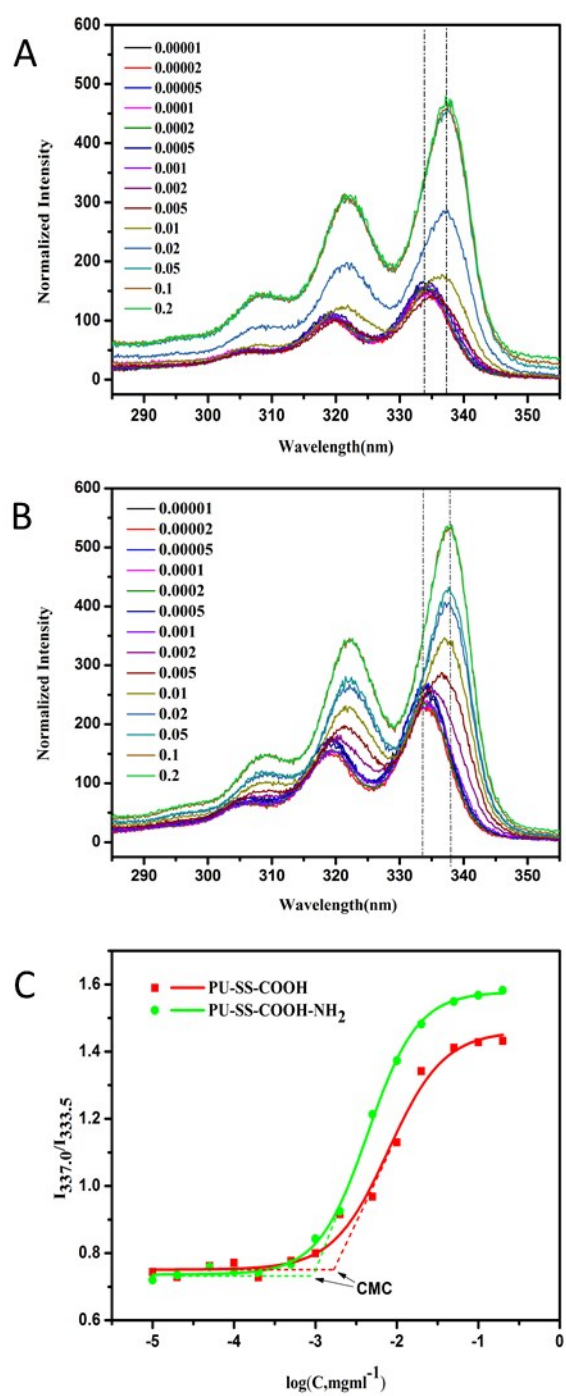

**Fig. S1** Typical fluorescence excitation spectra (372 nm) of PU-SS-COOH (A). Typical fluorescence excitation spectra (372 nm) of PU-SS-COOH-NH<sub>2</sub> (B). I<sub>337.0</sub>/I<sub>333.5</sub> ratios in the excitation spectra as a function of micellar concentrations (log C, mg ml<sup>-1</sup>). The CMC was obtained from the intersection of the two tangent lines shown by the arrows. The CMC of PU-SS-COOH and PU-SS-COOH-NH<sub>2</sub> was determined to be  $1.66 \times 10^{-3}$  mg ml<sup>-1</sup> and  $7.7 \times 10^{-4}$  mg ml<sup>-1</sup>. (C)
